# Supplementary material
Source: MDPI journal article supplement (https://www.mdpi.com/2075-163X/12/9/1101)

**Zircon U-Pb isotope data for the rocks of Semeitau and Delbegetei massifs****1. Semeitau massif. Porphyry monzonite, sample K21-18.**

| N an                             | Th/U | Isotope ratios                       |                                      | Rho  | Age, Ma                              |                                      | D, %  |
|----------------------------------|------|--------------------------------------|--------------------------------------|------|--------------------------------------|--------------------------------------|-------|
|                                  |      | <sup>207</sup> Pb / <sup>235</sup> U | <sup>206</sup> Pb / <sup>238</sup> U |      | <sup>207</sup> Pb / <sup>235</sup> U | <sup>206</sup> Pb / <sup>238</sup> U |       |
| Zircons of 1st group             |      |                                      |                                      |      |                                      |                                      |       |
| K21-18_01                        | 1.63 | 12.50 ± 1.40                         | 0.132 ± 0.012                        | 0.81 | 2510 ± 120                           | 788 ± 66                             | 218.5 |
| K21-18_03                        | 1.85 | 17.30 ± 1.70                         | 0.178 ± 0.017                        | 0.97 | 2820 ± 110                           | 1042 ± 92                            | 170.6 |
| K21-18_15                        | 1.80 | 17.20 ± 2.50                         | 0.166 ± 0.023                        | 0.95 | 2830 ± 150                           | 970 ± 120                            | 191.8 |
| K21-18_22                        | 1.92 | 13.40 ± 2.00                         | 0.140 ± 0.015                        | 0.72 | 2610 ± 130                           | 845 ± 87                             | 208.9 |
| K21-18_23                        | 1.79 | 15.00 ± 1.70                         | 0.159 ± 0.015                        | 0.83 | 2720 ± 110                           | 945 ± 82                             | 187.8 |
| K21-18_25                        | 1.79 | 13.60 ± 1.30                         | 0.145 ± 0.012                        | 0.87 | 2640 ± 100                           | 870 ± 68                             | 203.4 |
| K21-18_29                        | 1.74 | 13.70 ± 1.60                         | 0.161 ± 0.013                        | 0.69 | 2630 ± 120                           | 965 ± 74                             | 172.5 |
| K21-18_38                        | 1.69 | 13.50 ± 1.20                         | 0.143 ± 0.011                        | 0.87 | 2632 ± 87                            | 864 ± 66                             | 204.6 |
| K21-18_39                        | 1.85 | 11.09 ± 0.97                         | 0.134 ± 0.011                        | 0.94 | 2450 ± 100                           | 799 ± 64                             | 206.6 |
| K21-18_40                        | 1.66 | 13.90 ± 1.50                         | 0.154 ± 0.012                        | 0.72 | 2630 ± 110                           | 914 ± 64                             | 187.7 |
| K21-18_41                        | 1.87 | 16.50 ± 2.70                         | 0.177 ± 0.024                        | 0.83 | 2820 ± 140                           | 1060 ± 140                           | 166.0 |
| K21-18_42                        | 2.39 | 10.30 ± 1.30                         | 0.122 ± 0.011                        | 0.71 | 2340 ± 120                           | 736 ± 64                             | 217.9 |
| K21-18_44                        | 1.58 | 18.10 ± 1.80                         | 0.182 ± 0.016                        | 0.88 | 2890 ± 100                           | 1066 ± 86                            | 171.1 |
| K21-18_46                        | 1.53 | 15.10 ± 1.90                         | 0.179 ± 0.018                        | 0.80 | 2700 ± 130                           | 1044 ± 98                            | 158.6 |
| K21-18_47                        | 1.83 | 16.40 ± 2.10                         | 0.168 ± 0.019                        | 0.88 | 2810 ± 130                           | 990 ± 100                            | 183.8 |
| K21-18_48                        | 1.79 | 13.60 ± 1.40                         | 0.155 ± 0.015                        | 0.94 | 2620 ± 100                           | 918 ± 81                             | 185.4 |
| K21-18_49                        | 1.68 | 18.10 ± 1.90                         | 0.167 ± 0.017                        | 0.97 | 2890 ± 110                           | 992 ± 93                             | 191.3 |
| Zircons of 2 <sup>nd</sup> group |      |                                      |                                      |      |                                      |                                      |       |
| K21-18_09                        | 0.91 | 0.266 ± 0.019                        | 0.0388 ± 0.0009                      | 0.33 | 237 ± 15                             | 246 ± 6                              | -3.5  |
| K21-18_10                        | 0.64 | 0.291 ± 0.043                        | 0.0398 ± 0.0012                      | 0.20 | 250 ± 33                             | 252 ± 7                              | -0.7  |
| K21-18_28                        | 0.82 | 0.283 ± 0.024                        | 0.0401 ± 0.0009                      | 0.27 | 248 ± 19                             | 254 ± 6                              | -2.2  |
| K21-18_33                        | 0.77 | 0.282 ± 0.032                        | 0.0396 ± 0.0012                      | 0.27 | 252 ± 27                             | 251 ± 8                              | 0.6   |
| K21-18_34                        | 0.65 | 0.313 ± 0.036                        | 0.0397 ± 0.0009                      | 0.20 | 267 ± 27                             | 251 ± 6                              | 6.5   |
| K21-18_36                        | 0.54 | 0.293 ± 0.040                        | 0.0392 ± 0.0015                      | 0.28 | 248 ± 31                             | 248 ± 9                              | 0.1   |
| K21-18_37                        | 0.65 | 0.328 ± 0.048                        | 0.0392 ± 0.0014                      | 0.24 | 278 ± 36                             | 248 ± 9                              | 12.3  |
| K21-18_50                        | 0.60 | 0.292 ± 0.029                        | 0.0383 ± 0.0009                      | 0.24 | 253 ± 23                             | 242 ± 6                              | 4.4   |
|                                  |      |                                      |                                      |      |                                      |                                      |       |

| Zircon standards used in the measurement |      |                                    |                                    |      |                                    |                                    |      |
|------------------------------------------|------|------------------------------------|------------------------------------|------|------------------------------------|------------------------------------|------|
| N an                                     | Th/U | Isotope ratios                     |                                    | Rho  | Age, Ma                            |                                    | D, % |
|                                          |      | $^{207}\text{Pb} / ^{235}\text{U}$ | $^{206}\text{Pb} / ^{238}\text{U}$ |      | $^{207}\text{Pb} / ^{235}\text{U}$ | $^{206}\text{Pb} / ^{238}\text{U}$ |      |
| Plesovice                                | 0.09 | $0.4030 \pm 0.0180$                | $0.0535 \pm 0.0007$                | 0.28 | $343 \pm 13$                       | $336 \pm 4$                        | 2.2  |
| Plesovice                                | 0.12 | $0.3820 \pm 0.0160$                | $0.0539 \pm 0.0007$                | 0.31 | $326 \pm 11$                       | $339 \pm 4$                        | -3.7 |
| Plesovice                                | 0.10 | $0.4060 \pm 0.0200$                | $0.0537 \pm 0.0008$                | 0.28 | $343 \pm 15$                       | $337 \pm 5$                        | 1.8  |
| Plesovice                                | 0.10 | $0.4100 \pm 0.0220$                | $0.0537 \pm 0.0009$                | 0.30 | $346 \pm 16$                       | $337 \pm 5$                        | 2.7  |
| Plesovice                                | 0.11 | $0.3820 \pm 0.0160$                | $0.0537 \pm 0.0008$                | 0.33 | $327 \pm 12$                       | $337 \pm 5$                        | -3.0 |
| Plesovice                                | 0.10 | $0.3890 \pm 0.0180$                | $0.0537 \pm 0.0007$                | 0.28 | $331 \pm 13$                       | $337 \pm 4$                        | -1.8 |
| Plesovice                                | 0.10 | $0.3900 \pm 0.0150$                | $0.0537 \pm 0.0007$                | 0.35 | $333 \pm 11$                       | $337 \pm 4$                        | -1.2 |
| Plesovice                                | 0.10 | $0.4080 \pm 0.0180$                | $0.0537 \pm 0.0005$                | 0.23 | $345 \pm 13$                       | $337 \pm 3$                        | 2.3  |
| Plesovice                                | 0.10 | $0.3950 \pm 0.0180$                | $0.0537 \pm 0.0007$                | 0.29 | $336 \pm 13$                       | $337 \pm 4$                        | -0.3 |
| Plesovice                                | 0.10 | $0.4000 \pm 0.0170$                | $0.0537 \pm 0.0007$                | 0.28 | $340 \pm 12$                       | $337 \pm 4$                        | 0.9  |
| Plesovice                                | 0.10 | $0.3910 \pm 0.0180$                | $0.0537 \pm 0.0007$                | 0.27 | $333 \pm 13$                       | $337 \pm 4$                        | -1.2 |
| Plesovice                                | 0.11 | $0.3990 \pm 0.0160$                | $0.0537 \pm 0.0006$                | 0.28 | $339 \pm 12$                       | $337 \pm 4$                        | 0.6  |
| Plesovice                                | 0.10 | $0.3850 \pm 0.0160$                | $0.0537 \pm 0.0007$                | 0.31 | $329 \pm 11$                       | $337 \pm 4$                        | -2.4 |
| 91500                                    | 0.36 | $1.8400 \pm 0.1100$                | $0.1797 \pm 0.0032$                | 0.30 | $1040 \pm 39$                      | $1065 \pm 18$                      | -2.3 |
| 91500                                    | 0.37 | $1.8300 \pm 0.1200$                | $0.1794 \pm 0.0038$                | 0.32 | $1036 \pm 44$                      | $1063 \pm 21$                      | -2.5 |
| 91500                                    | 0.41 | $1.8200 \pm 0.1100$                | $0.1792 \pm 0.0031$                | 0.29 | $1030 \pm 41$                      | $1062 \pm 17$                      | -3.0 |
| 91500                                    | 0.41 | $1.8800 \pm 0.1000$                | $0.1801 \pm 0.0040$                | 0.42 | $1061 \pm 37$                      | $1067 \pm 22$                      | -0.6 |
| 91500                                    | 0.38 | $1.8700 \pm 0.1000$                | $0.1801 \pm 0.0036$                | 0.37 | $1060 \pm 38$                      | $1067 \pm 19$                      | -0.7 |
| 91500                                    | 0.34 | $1.8500 \pm 0.1100$                | $0.1797 \pm 0.0036$                | 0.34 | $1049 \pm 39$                      | $1065 \pm 20$                      | -1.5 |
| 91500                                    | 0.32 | $1.8100 \pm 0.1000$                | $0.1785 \pm 0.0043$                | 0.44 | $1040 \pm 37$                      | $1058 \pm 24$                      | -1.7 |
| 91500                                    | 0.32 | $1.8800 \pm 0.1000$                | $0.1802 \pm 0.0034$                | 0.35 | $1061 \pm 36$                      | $1070 \pm 20$                      | -0.8 |
| 91500                                    | 0.32 | $1.8500 \pm 0.1100$                | $0.1774 \pm 0.0033$                | 0.31 | $1042 \pm 40$                      | $1052 \pm 18$                      | -1.0 |
| 91500                                    | 0.33 | $1.8800 \pm 0.1200$                | $0.1786 \pm 0.0038$                | 0.33 | $1063 \pm 41$                      | $1059 \pm 21$                      | 0.4  |
| 91500                                    | 0.30 | $1.8900 \pm 0.1100$                | $0.1764 \pm 0.0047$                | 0.46 | $1066 \pm 40$                      | $1046 \pm 25$                      | 1.9  |
| 91500                                    | 0.30 | $1.8300 \pm 0.1400$                | $0.1770 \pm 0.0039$                | 0.29 | $1039 \pm 51$                      | $1050 \pm 21$                      | -1.0 |

Concordia diagrams of standard zircons 91500 while dating Semeitau massif zircons

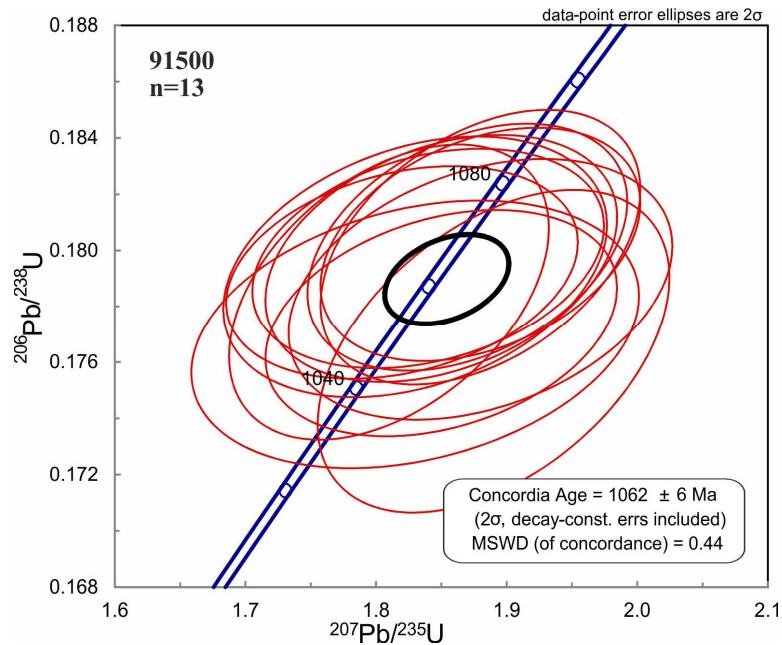

## 2. Delbegetei massif. Quartz monzonite, sample X-1001.

| N an      | Th/U | Isotope ratios                     |                                    | Rho  | Age, Ma                            |                                    | D, %  |
|-----------|------|------------------------------------|------------------------------------|------|------------------------------------|------------------------------------|-------|
|           |      | $^{207}\text{Pb} / ^{235}\text{U}$ | $^{206}\text{Pb} / ^{238}\text{U}$ |      | $^{207}\text{Pb} / ^{235}\text{U}$ | $^{206}\text{Pb} / ^{238}\text{U}$ |       |
| X-1001_01 | 0.44 | 0.2860 ± 0.0380                    | 0.0398 ± 0.0016                    | 0.30 | 249 ± 30                           | 251 ± 10                           | -0.9  |
| X-1001_03 | 0.38 | 0.3100 ± 0.0500                    | 0.0396 ± 0.0016                    | 0.25 | 266 ± 40                           | 250 ± 10                           | 6.4   |
| X-1001_04 | 0.32 | 0.3150 ± 0.0460                    | 0.0394 ± 0.0022                    | 0.38 | 267 ± 36                           | 249 ± 14                           | 7.2   |
| X-1001_05 | 0.34 | 0.3190 ± 0.0620                    | 0.0397 ± 0.0017                    | 0.22 | 266 ± 47                           | 251 ± 11                           | 6.0   |
| X-1001_06 | 0.35 | 0.2890 ± 0.0400                    | 0.0400 ± 0.0016                    | 0.29 | 247 ± 32                           | 253 ± 10                           | -2.4  |
| X-1001_07 | 0.38 | 0.2680 ± 0.0440                    | 0.0394 ± 0.0019                    | 0.29 | 235 ± 36                           | 249 ± 12                           | -5.6  |
| X-1001_08 | 0.32 | 0.2430 ± 0.0400                    | 0.0398 ± 0.0018                    | 0.27 | 216 ± 34                           | 251 ± 11                           | -13.9 |
| X-1001_09 | 0.32 | 0.2870 ± 0.0510                    | 0.0395 ± 0.0016                    | 0.23 | 242 ± 39                           | 250 ± 10                           | -3.1  |
| X-1001_10 | 0.30 | 0.3040 ± 0.0330                    | 0.0392 ± 0.0014                    | 0.33 | 263 ± 26                           | 248 ± 8                            | 6.2   |
| X-1001_11 | 0.39 | 0.2540 ± 0.0350                    | 0.0397 ± 0.0018                    | 0.33 | 222 ± 28                           | 251 ± 11                           | -11.6 |
| X-1001_12 | 0.32 | 0.3050 ± 0.0320                    | 0.0396 ± 0.0014                    | 0.34 | 263 ± 24                           | 250 ± 8                            | 5.1   |
| X-1001_13 | 0.30 | 0.2570 ± 0.0530                    | 0.0390 ± 0.0020                    | 0.25 | 222 ± 42                           | 246 ± 12                           | -9.8  |
| X-1001_14 | 0.26 | 0.2940 ± 0.0380                    | 0.0397 ± 0.0019                    | 0.37 | 254 ± 29                           | 251 ± 12                           | 1.2   |
| X-1001_15 | 0.28 | 0.2700 ± 0.0390                    | 0.0385 ± 0.0014                    | 0.25 | 237 ± 31                           | 243 ± 9                            | -2.6  |
| X-1001_16 | 0.30 | 0.2380 ± 0.0300                    | 0.0390 ± 0.0018                    | 0.37 | 211 ± 25                           | 246 ± 11                           | -14.2 |
| X-1001_17 | 0.43 | 0.2910 ± 0.0470                    | 0.0388 ± 0.0016                    | 0.26 | 248 ± 35                           | 245 ± 10                           | 1.2   |
| X-1001_19 | 0.41 | 0.3110 ± 0.0400                    | 0.0389 ± 0.0016                    | 0.32 | 266 ± 30                           | 246 ± 10                           | 8.1   |
| X-1001_20 | 0.31 | 0.2860 ± 0.0380                    | 0.0407 ± 0.0014                    | 0.26 | 247 ± 30                           | 257 ± 9                            | -4.0  |
| X-1001_22 | 0.31 | 0.2700 ± 0.0390                    | 0.0390 ± 0.0015                    | 0.27 | 246 ± 34                           | 246 ± 10                           | -0.2  |
| X-1001_23 | 0.27 | 0.2550 ± 0.0430                    | 0.0412 ± 0.0023                    | 0.33 | 227 ± 36                           | 260 ± 14                           | -12.7 |
| X-1001_24 | 0.32 | 0.2950 ± 0.0420                    | 0.0384 ± 0.0017                    | 0.31 | 254 ± 32                           | 243 ± 10                           | 4.5   |
| X-1001_25 | 0.35 | 0.3030 ± 0.0310                    | 0.0398 ± 0.0013                    | 0.32 | 266 ± 25                           | 252 ± 8                            | 5.7   |
| X-1001_26 | 0.51 | 0.3030 ± 0.0400                    | 0.0388 ± 0.0013                    | 0.25 | 261 ± 31                           | 245 ± 8                            | 6.5   |
| X-1001_27 | 0.41 | 0.2680 ± 0.0310                    | 0.0399 ± 0.0017                    | 0.37 | 234 ± 25                           | 252 ± 10                           | -7.1  |
| X-1001_28 | 0.49 | 0.3000 ± 0.0370                    | 0.0391 ± 0.0014                    | 0.29 | 258 ± 29                           | 247 ± 9                            | 4.5   |
| X-1001_29 | 0.40 | 0.3000 ± 0.0320                    | 0.0399 ± 0.0015                    | 0.35 | 259 ± 25                           | 252 ± 9                            | 2.7   |
| X-1001_30 | 0.40 | 0.2610 ± 0.0440                    | 0.0388 ± 0.0017                    | 0.26 | 223 ± 35                           | 245 ± 10                           | -9.0  |
| X-1001_31 | 0.38 | 0.2940 ± 0.0480                    | 0.0396 ± 0.0017                    | 0.26 | 256 ± 38                           | 250 ± 11                           | 2.4   |
| X-1001_34 | 0.33 | 0.3050 ± 0.0430                    | 0.0389 ± 0.0017                    | 0.31 | 259 ± 33                           | 246 ± 10                           | 5.3   |
| X-1001_35 | 0.31 | 0.3110 ± 0.0410                    | 0.0401 ± 0.0017                    | 0.32 | 272 ± 32                           | 253 ± 11                           | 7.5   |
| X-1001_36 | 0.43 | 0.2700 ± 0.0380                    | 0.0396 ± 0.0018                    | 0.32 | 235 ± 30                           | 250 ± 11                           | -6.0  |
| X-1001_37 | 0.44 | 0.2660 ± 0.0420                    | 0.0379 ± 0.0018                    | 0.30 | 232 ± 33                           | 240 ± 11                           | -3.3  |
| X-1001_38 | 0.42 | 0.2720 ± 0.0360                    | 0.0404 ± 0.0015                    | 0.28 | 237 ± 28                           | 256 ± 9                            | -7.2  |
| X-1001_39 | 0.47 | 0.2550 ± 0.0380                    | 0.0392 ± 0.0017                    | 0.29 | 227 ± 32                           | 248 ± 11                           | -8.5  |
| X-1001_40 | 0.35 | 0.3160 ± 0.0520                    | 0.0389 ± 0.0017                    | 0.27 | 266 ± 39                           | 248 ± 11                           | 7.3   |
| X-1001_41 | 0.30 | 0.2860 ± 0.0520                    | 0.0394 ± 0.0016                    | 0.22 | 247 ± 42                           | 249 ± 10                           | -0.7  |
| X-1001_42 | 0.50 | 0.2980 ± 0.0310                    | 0.0385 ± 0.0019                    | 0.47 | 265 ± 25                           | 243 ± 12                           | 9.1   |
| X-1001_43 | 0.32 | 0.2570 ± 0.0400                    | 0.0400 ± 0.0018                    | 0.29 | 227 ± 34                           | 252 ± 11                           | -9.9  |
| X-1001_44 | 0.32 | 0.2880 ± 0.0480                    | 0.0409 ± 0.0016                    | 0.23 | 243 ± 36                           | 259 ± 10                           | -6.0  |
| X-1001_45 | 0.52 | 0.2650 ± 0.0250                    | 0.0396 ± 0.0015                    | 0.40 | 234 ± 20                           | 280 ± 9                            | -6.4  |
| X-1001_47 | 0.37 | 0.2780 ± 0.0400                    | 0.0383 ± 0.0016                    | 0.29 | 238 ± 32                           | 242 ± 10                           | -1.7  |
| X-1001_48 | 0.45 | 0.2710 ± 0.0340                    | 0.0384 ± 0.0013                    | 0.27 | 237 ± 27                           | 243 ± 8                            | -2.3  |
| X-1001_50 | 0.36 | 0.2660 ± 0.0330                    | 0.0377 ± 0.0014                    | 0.30 | 231 ± 26                           | 238 ± 9                            | -3.0  |
| X-1001_51 | 0.27 | 0.3060 ± 0.0410                    | 0.0388 ± 0.0022                    | 0.42 | 267 ± 32                           | 245 ± 13                           | 9.0   |

| Zircon standards used in the measurement |      |                                    |                                    |      |                                    |                                    |      |
|------------------------------------------|------|------------------------------------|------------------------------------|------|------------------------------------|------------------------------------|------|
| N an                                     | Th/U | Isotope ratios                     |                                    | Rho  | Age, Ma                            |                                    | D, % |
|                                          |      | $^{207}\text{Pb} / ^{235}\text{U}$ | $^{206}\text{Pb} / ^{238}\text{U}$ |      | $^{207}\text{Pb} / ^{235}\text{U}$ | $^{206}\text{Pb} / ^{238}\text{U}$ |      |
| Plesovice                                | 0.10 | $0.3940 \pm 0.0200$                | $0.0534 \pm 0.0014$                | 0.52 | $335 \pm 15$                       | $335 \pm 9$                        | -0.1 |
| Plesovice                                | 0.10 | $0.3950 \pm 0.0190$                | $0.0539 \pm 0.0013$                | 0.50 | $338 \pm 14$                       | $339 \pm 8$                        | -0.4 |
| Plesovice                                | 0.10 | $0.3930 \pm 0.0250$                | $0.0545 \pm 0.0016$                | 0.46 | $332 \pm 18$                       | $342 \pm 10$                       | -2.9 |
| Plesovice                                | 0.10 | $0.3940 \pm 0.0180$                | $0.0534 \pm 0.0013$                | 0.53 | $335 \pm 13$                       | $335 \pm 8$                        | 0.0  |
| Plesovice                                | 0.10 | $0.3940 \pm 0.0180$                | $0.0537 \pm 0.0013$                | 0.53 | $335 \pm 13$                       | $337 \pm 8$                        | -0.7 |
| Plesovice                                | 0.10 | $0.3860 \pm 0.0220$                | $0.0526 \pm 0.0013$                | 0.43 | $328 \pm 16$                       | $331 \pm 8$                        | -0.8 |
| Plesovice                                | 0.10 | $0.4060 \pm 0.0240$                | $0.0539 \pm 0.0015$                | 0.47 | $343 \pm 17$                       | $338 \pm 9$                        | 1.4  |
| Plesovice                                | 0.11 | $0.3910 \pm 0.0210$                | $0.0542 \pm 0.0012$                | 0.41 | $332 \pm 15$                       | $340 \pm 8$                        | -2.4 |
| 91500                                    | 0.29 | $1.8700 \pm 0.1400$                | $0.1813 \pm 0.0064$                | 0.47 | $1046 \pm 50$                      | $1072 \pm 35$                      | -2.4 |
| 91500                                    | 0.27 | $1.8900 \pm 0.1900$                | $0.1739 \pm 0.0060$                | 0.34 | $1042 \pm 65$                      | $1032 \pm 33$                      | 1.0  |
| 91500                                    | 0.28 | $1.8900 \pm 0.1600$                | $0.1774 \pm 0.0067$                | 0.45 | $1056 \pm 55$                      | $1050 \pm 37$                      | 0.6  |
| 91500                                    | 0.28 | $1.9200 \pm 0.1800$                | $0.1746 \pm 0.0065$                | 0.40 | $1067 \pm 63$                      | $1035 \pm 36$                      | 3.1  |
| 91500                                    | 0.29 | $1.8600 \pm 0.1400$                | $0.1806 \pm 0.0046$                | 0.34 | $1037 \pm 52$                      | $1072 \pm 26$                      | -3.3 |
| 91500                                    | 0.27 | $1.9700 \pm 0.1900$                | $0.1798 \pm 0.0073$                | 0.42 | $1073 \pm 65$                      | $1064 \pm 39$                      | 0.8  |
| 91500                                    | 0.29 | $1.8000 \pm 0.1600$                | $0.1782 \pm 0.0075$                | 0.47 | $1021 \pm 57$                      | $1055 \pm 41$                      | -3.2 |
| 91500                                    | 0.27 | $1.9700 \pm 0.1900$                | $0.1834 \pm 0.0081$                | 0.46 | $1083 \pm 65$                      | $1082 \pm 44$                      | 0.1  |

Concordia diagrams of standard zircons 91500 while dating Delbegetei massif zircons

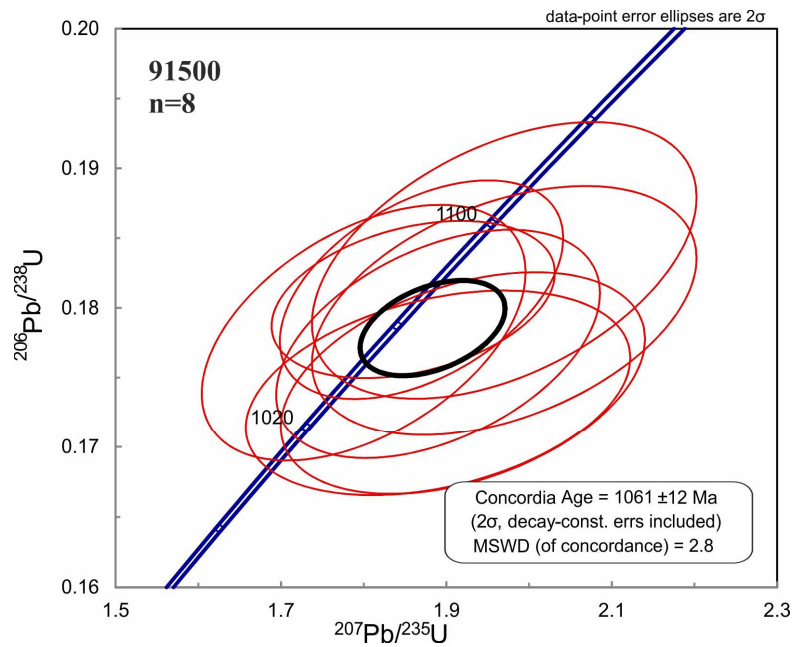

Supplement: s1 [file s1]
